# Supplementary material for: Human DIMT1 generates N26,6A-dimethylation–containing small RNAs
Source: PubMed Central journal article supplement (PMC8463865; doi:10.1016/j.jbc.2021.101146), 2021-08-30
Supplement: mmc1.pdf [file mmc1.pdf]

## Human DIMT1 generates $N_2^{6,6}$ A-dimethylation-containing small RNAs

Hui Shen<sup>1</sup>, Yulia Gonskikh<sup>1</sup>, Julian Stoute<sup>1,2</sup>, Kathy Fange Liu<sup>1,2\*</sup>

### Affiliations:

<sup>1</sup>Department of Biochemistry and Biophysics, Perelman School of Medicine, University of Pennsylvania, Philadelphia, PA 19104, USA

<sup>2</sup>Graduate Group in Biochemistry and Molecular Biophysics, Perelman School of Medicine, University of Pennsylvania, Philadelphia, PA 19104, USA

\*Correspondence to liufg@pennmedicine.upenn.edu

Running title: Small RNAs identified carrying  $N_2^{6,6}$ A-dimethylation

Keywords: 18S rRNA, small RNA, DIMT1, catalytic role, RNA methylation, ribosome assembly

### Supporting Information

Included Supporting Information: Supplementary Figures S1-S7.

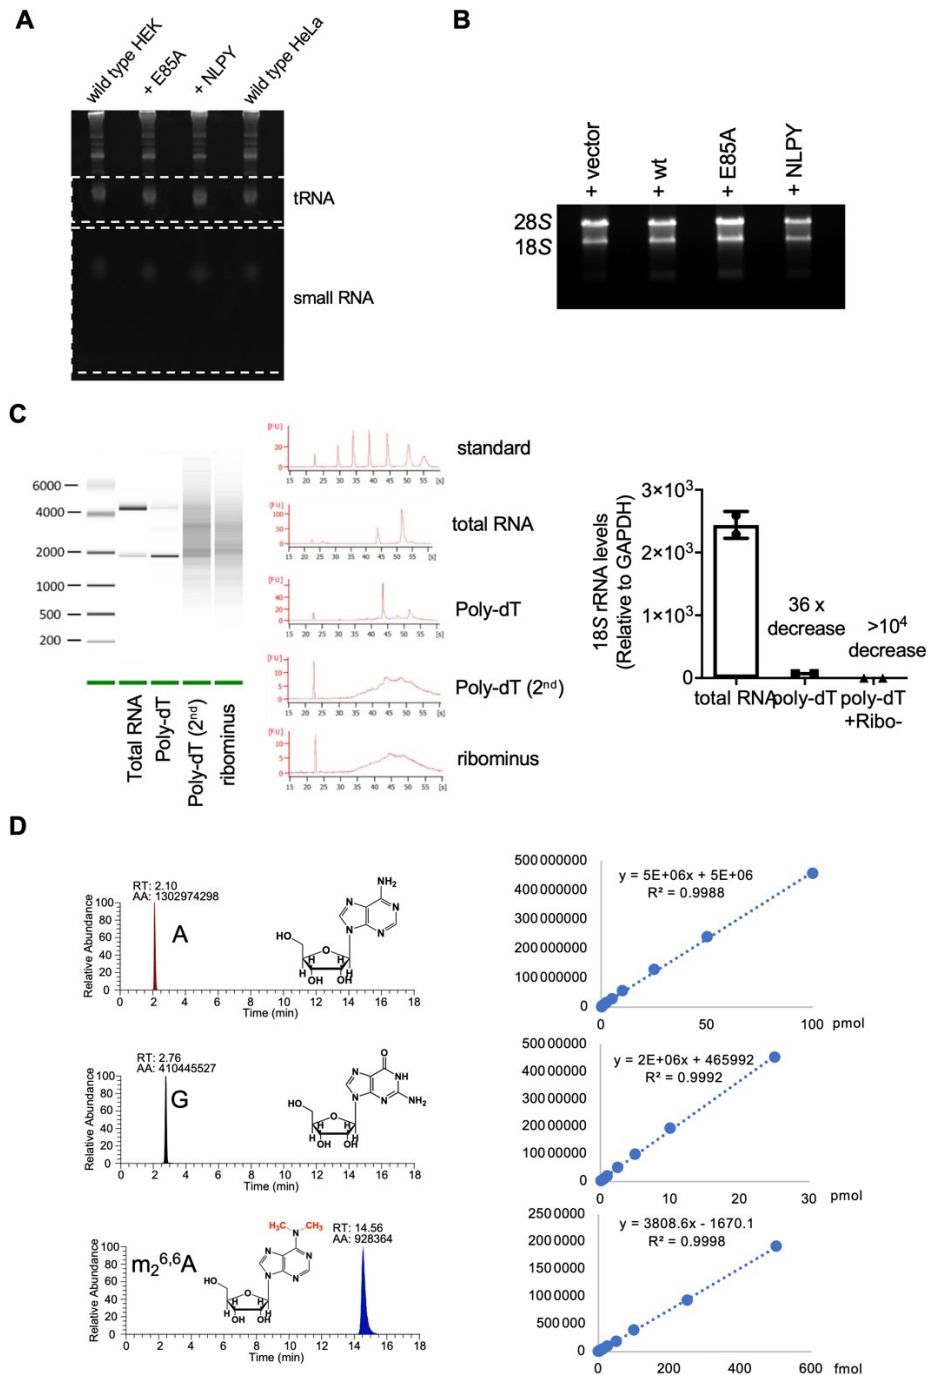

**Figure S1. Purification of multiple RNA species.** Purification of (A) tRNAs and (B) 18S and 28S rRNA. (C) RNA bioanalyzer results of the purification process of polyadenylated RNAs. This gel-like image is the simulated image of the transfer of the raw migration time and intensity data to mimic electrophoretic assays. qRT-PCR of 18S rRNA from total RNA, after two rounds of poly-dT extracted, and after one more round of ribominus purification. (D) LC-MS/MS channels, peak areas, and standard curves of adenosine, guanosine, and  $m_2^{6,6}A$ .

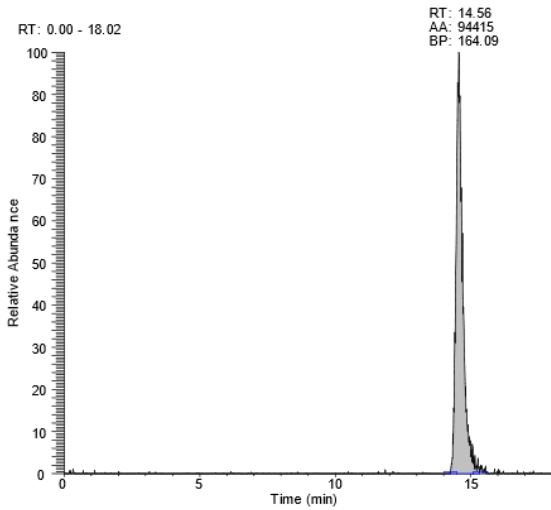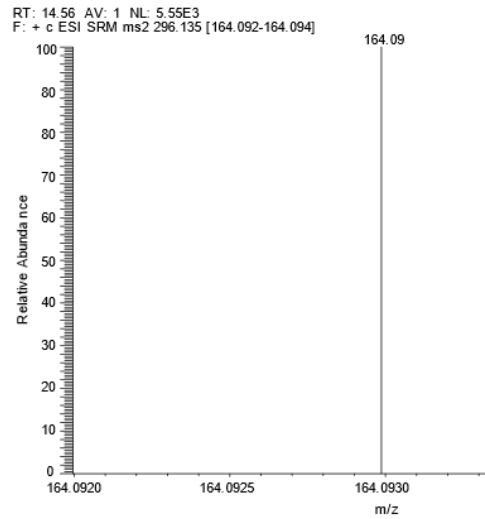

$m_2^{6,6A}$  sample

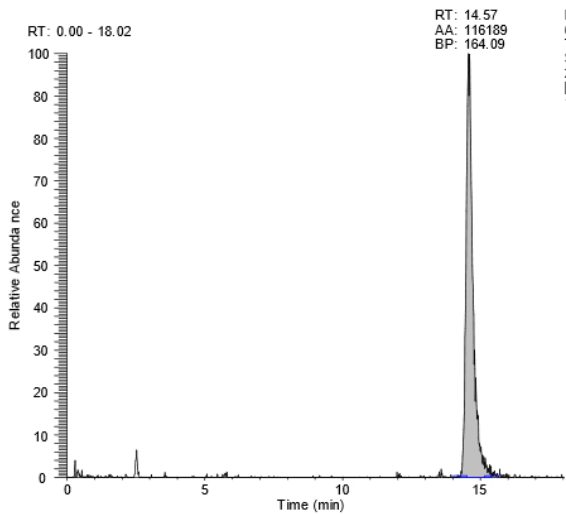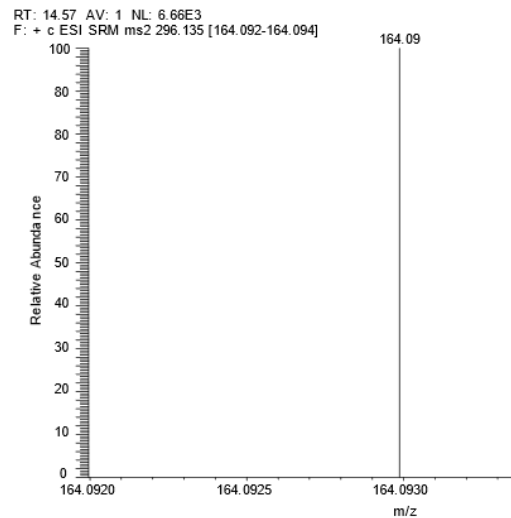

**Figure S2.** ESI-CID data for  $m_2^{6,6A}$  standard (paired with chromatogram peaks), measured using (A) synthetic standards (upper panels) and 18S rRNA isolated from HEK 293T cells (lower panels).

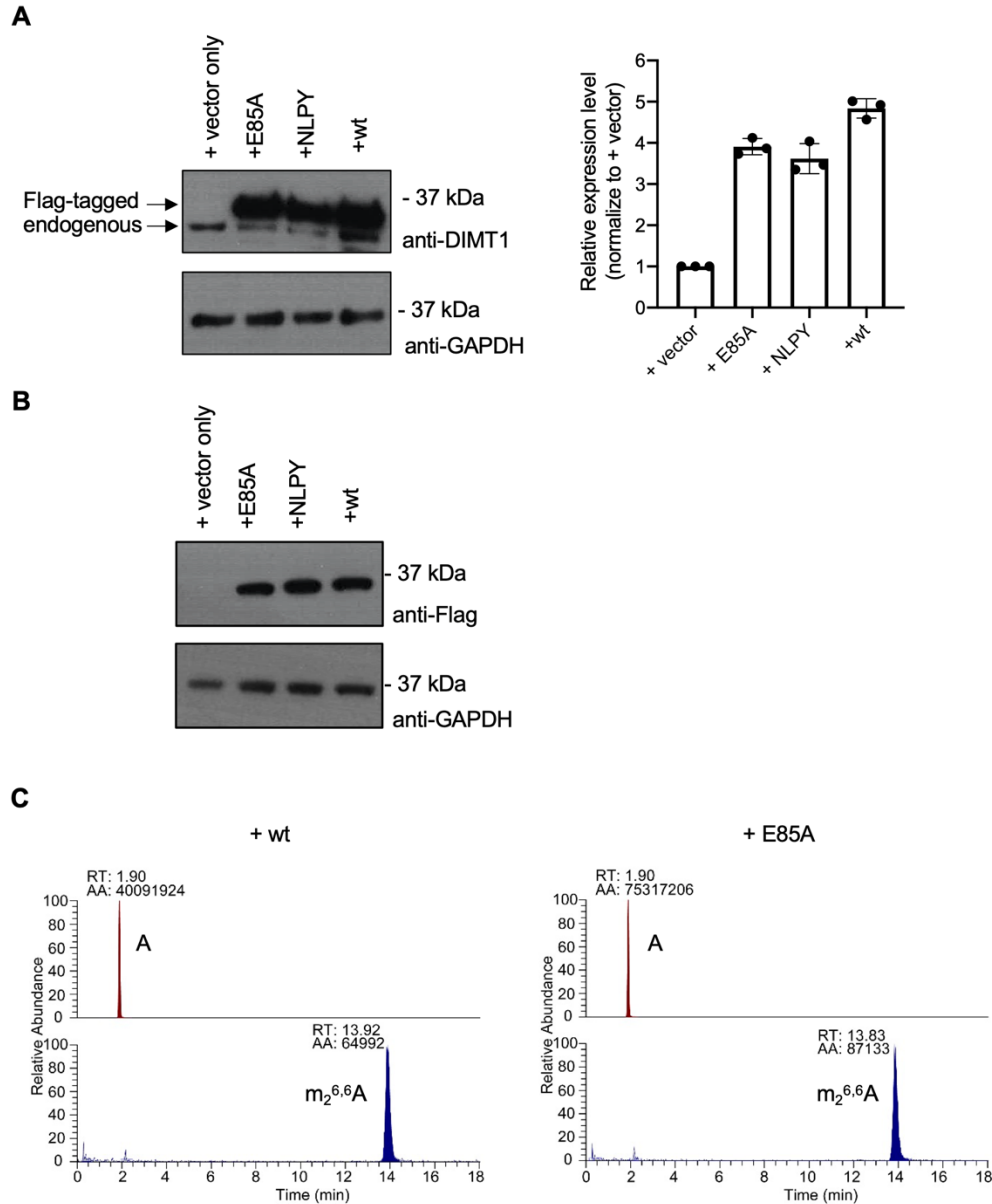

**Figure S3. NLPY DIMT1 is catalytically inactive.** (A) Left: Western blots showing the expression of DIMT1 (both Flag-tagged and endogenous) in *DIMT1*<sup>+/-</sup> + E85A, *DIMT1*<sup>+/-</sup> + wild type (wt), *DIMT1*<sup>+/-</sup> + NLPY (wt), and *DIMT1*<sup>+/-</sup> + empty vector cells with anti-DIMT1 antibody. Right: Quantification of the expression of DIMT1 in these cells. (B) Western blots showing the expression of FLAG-tagged DIMT1 in *DIMT1*<sup>+/-</sup> + E85A, *DIMT1*<sup>+/-</sup> + wild type (wt), *DIMT1*<sup>+/-</sup> + NLPY, and *DIMT1*<sup>+/-</sup> + empty vector with anti-Flag antibody. (C) LC-MS/MS channels and peak areas of adenosine and  $m_2^{6,6}A$  in small RNA (< 40 nt) extracted from *DIMT1*<sup>+/-</sup> + wild type DIMT1 (left) and *DIMT1*<sup>+/-</sup> + E85A DIMT1.

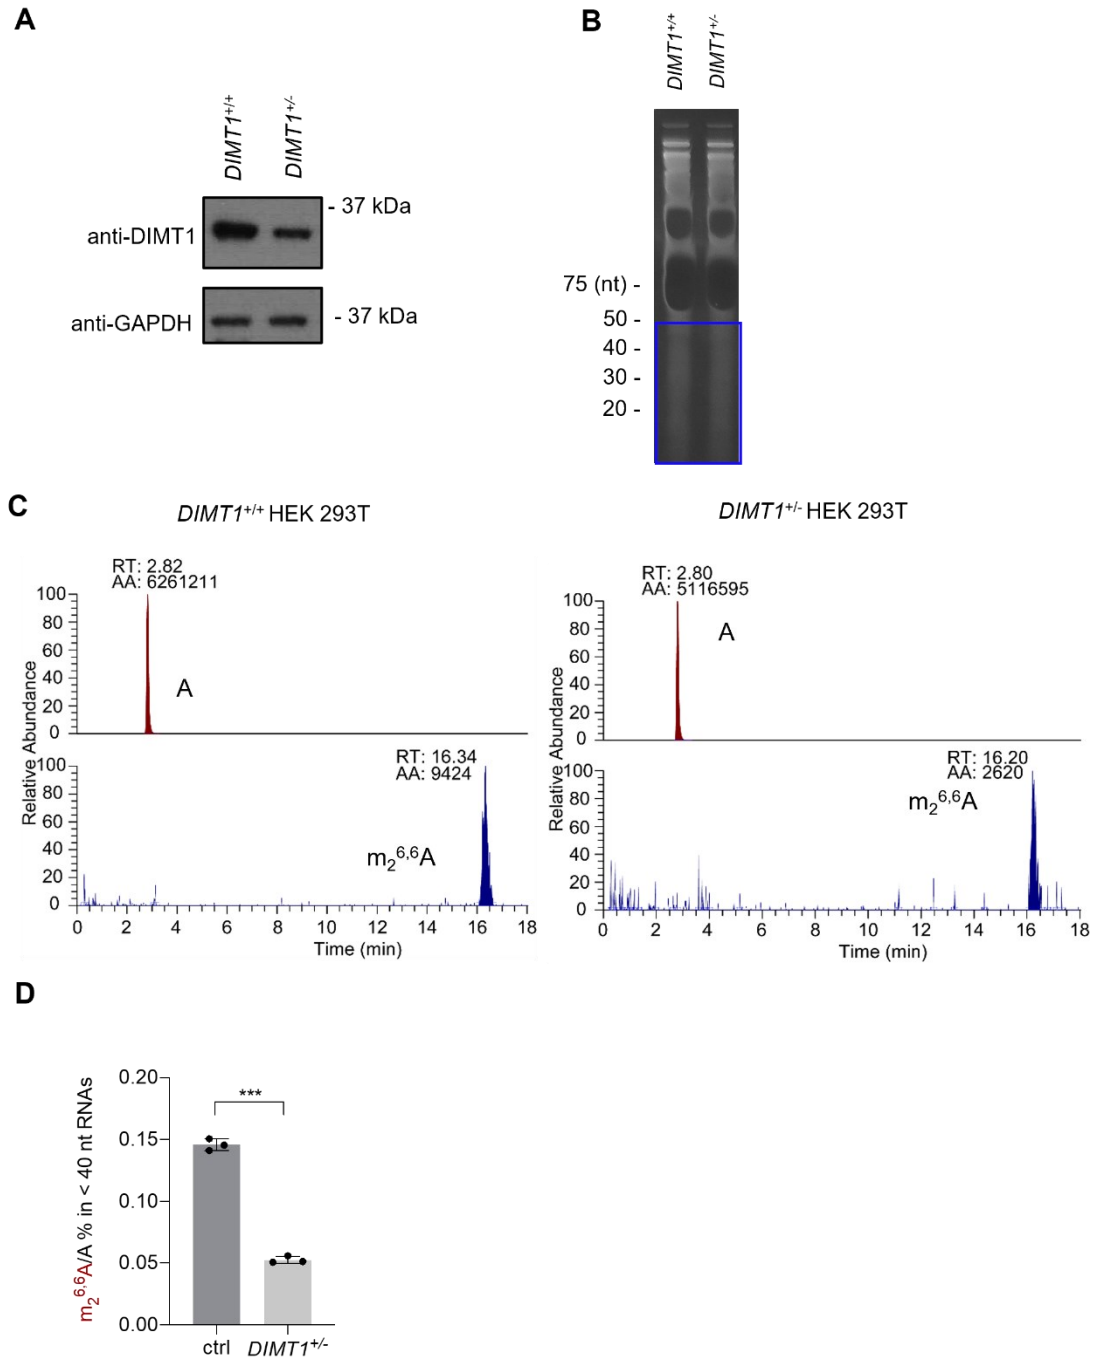

**Figure S4.** (A) Western blots showing the expression of endogenous DIMT1 in *DIMT1*<sup>+/+</sup> and *DIMT1*<sup>-/-</sup> HEK 293T cells. (B) Gel purification of small RNAs from *DIMT1*<sup>+/+</sup> and *DIMT1*<sup>-/-</sup> HEK 293T cells. (C) LC-MS/MS channels and peak areas of adenosine and  $m_2^{6,6}A$  in small RNA (< 40 nt) extracted from *DIMT1*<sup>+/+</sup> (left) and *DIMT1*<sup>-/-</sup> (right) HEK 293T cells. (D) quantification of  $m_2^{6,6}A$  in small RNA (< 40 nt) from *DIMT1*<sup>+/+</sup> (ctrl) and *DIMT1*<sup>-/-</sup> HEK 293T cells.

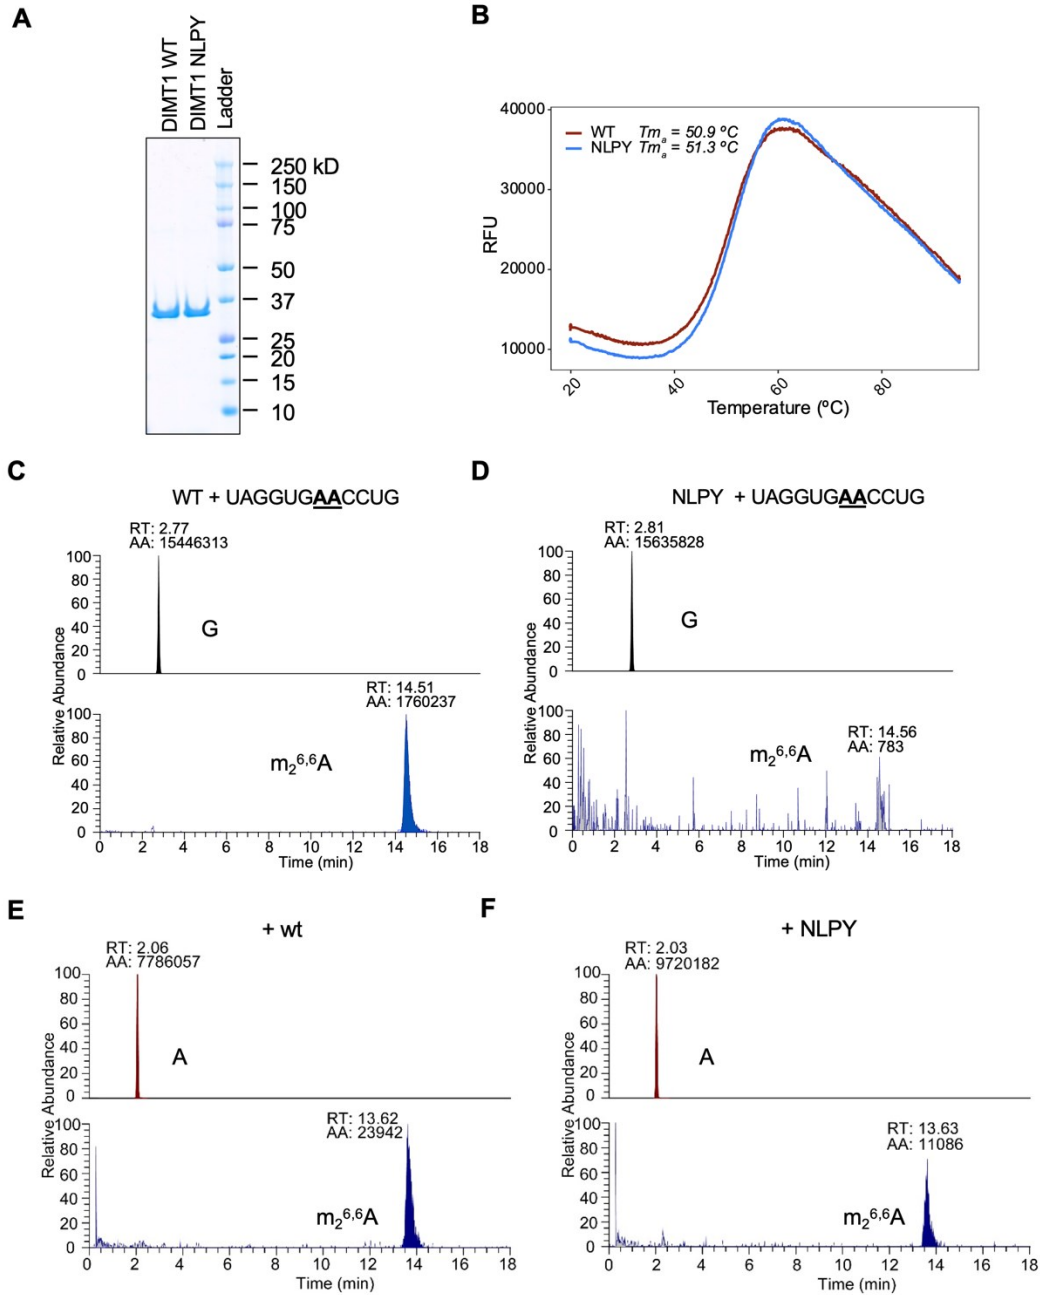

**Figure S5. NLPY DIMT1 is catalytically inactive.** (A) SDS-PAGE results of purified wild type and DIMT1 NLPY variant. (B) Thermostability of WT-DIMT1 and NLPY DIMT1 variant. RFU means relative fluorescence units. LC-MS/MS channels and peak areas of guanosine and  $m_2^{6,6}A$  in the *in vitro* reactions with (C) wild type or (D) NLPY DIMT1 variant. LC-MS/MS channels and peak areas of adenosine and  $m_2^{6,6}A$  in (E) *DIMT1*<sup>+/-</sup> + wild type (wt) or (F) *DIMT1*<sup>+/-</sup> + NLPY cells.

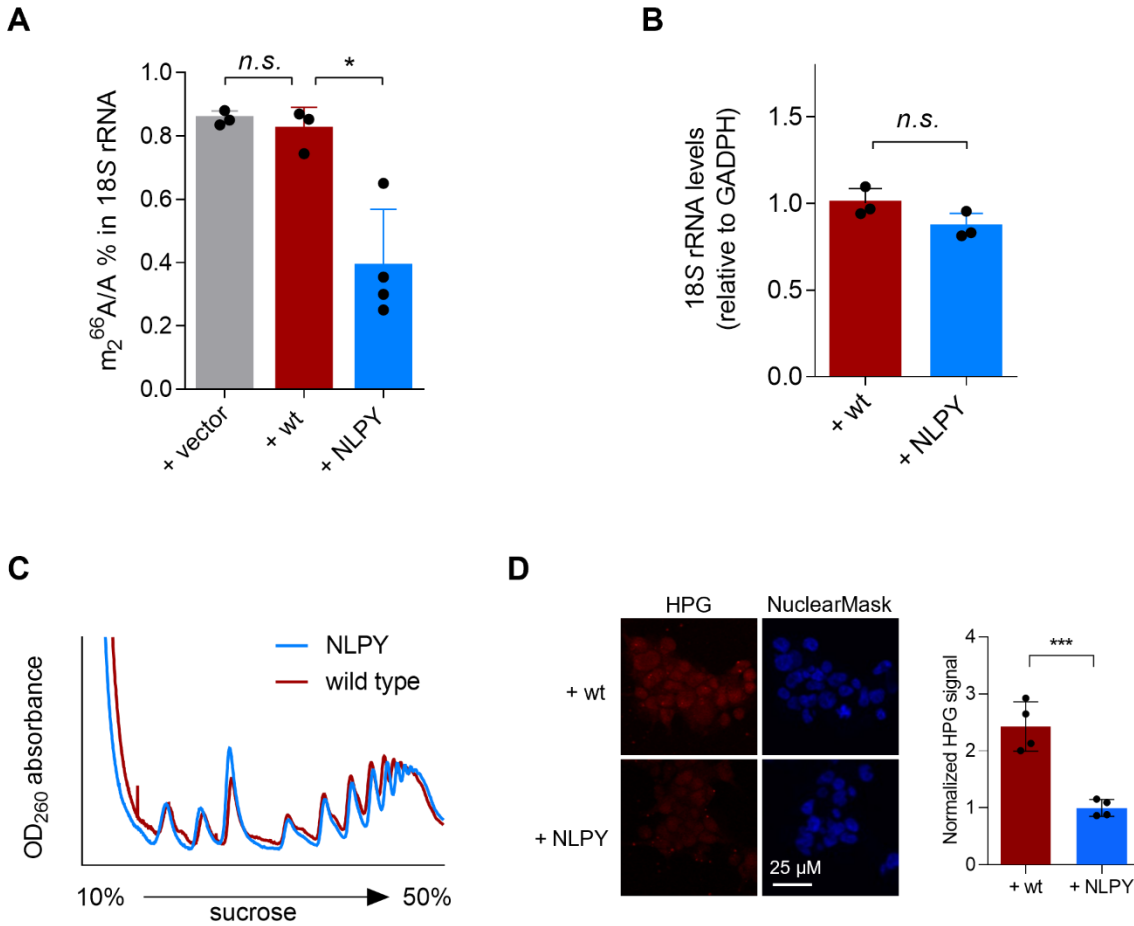

**Figure S6. Expression of the catalytically inactive NLPY DIMT1 decreases  $m_2^{6,6}A$  in 18S rRNA and impairs protein synthesis but does not lead to obvious changes in the levels of 18S rRNA or 40S monosome.** (A) LC-MS/MS quantification of  $m_2^{6,6}A$  in 18S rRNA extracted from  $DIMT1^{+/-}$  + empty vector,  $DIMT1^{+/-}$  + wild type (wt), and  $DIMT1^{+/-}$  + NLPY cells.  $p$  values were determined using a two-tailed Student's  $t$ -test for unpaired samples. Error bars represent mean  $\pm$  SD. \*\*\* $p < 0.001$ , and  $n.s. = p > 0.05$ . (B) qRT-qPCR quantification of 18S rRNA as normalized the level of GAPDH in  $DIMT1^{+/-}$  + wild-type DIMT1 and  $DIMT1^{+/-}$  + NLPY DIMT1 cells.  $p$  values were determined using a two-tailed Student's  $t$ -test for unpaired samples. Error bars represent mean  $\pm$  SD;  $n.s. = p > 0.05$ . (C) Polysome profiles of  $DIMT1^{+/-}$  + wild type and  $DIMT1^{+/-}$  + NLPY variant cells. (D) Imaging and quantification of fluorescent-labeled nascent protein in  $DIMT1^{+/-}$  + wild type and  $DIMT1^{+/-}$  + NLPY cells. Nuclei were stained with NuclearMask.

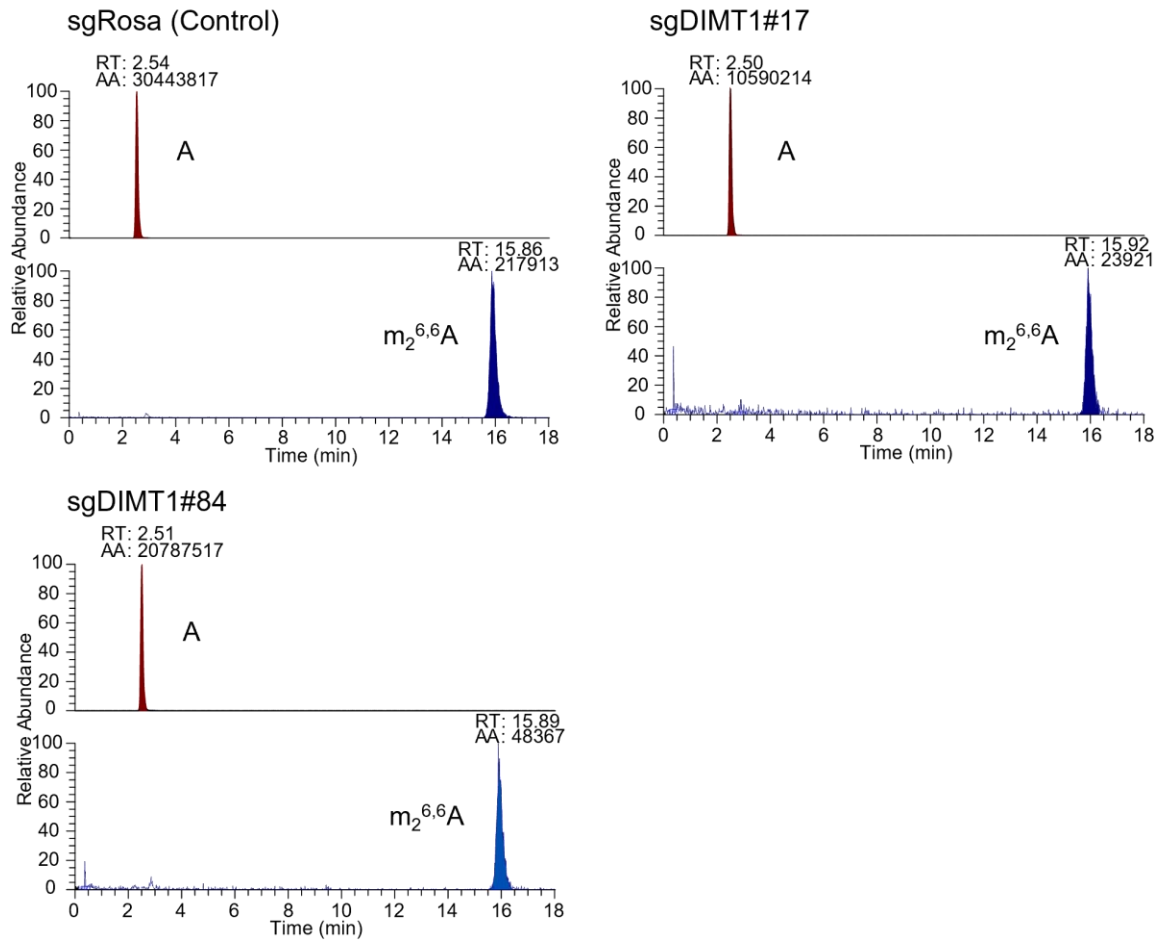

**Figure S7. Downregulation of DIMT1 in MOLM-13C leads to a decreased level of m<sub>2</sub><sup>6,6</sup>A in small RNAs.** LC-MS/MS channels and peak areas of adenosine and m<sub>2</sub><sup>6,6</sup>A MOLM-13 cells transfected with sgCtrl, sgDIMT1#17, or sgDIMT1#84.
